# Supplementary material for: Probing size-dependent defects in zinc oxide using synchrotron techniques: impact on photocatalytic efficiency
Source: Royal Society of Chemistry journal article supplement (doi:10.1039/d3cp02923a), 2023-01-01
Supplement: d3cp02923a1.pdf [file d3cp02923a1.pdf]

## **Probing Size-Dependent Defects in Zinc Oxide using Synchrotron Techniques: Impact on Photocatalytic Efficiency**

Ankit Kadian<sup>1</sup>, V. Manikandan<sup>1</sup>, Kapil Dev<sup>1</sup>, Vishnu Kumar<sup>2</sup>, Cheng-Jie Yang<sup>4</sup>, Bi-Hsuan Lin<sup>3</sup>, C.L. Chen<sup>3</sup>, C.L. Dong<sup>4</sup>, K. Asokan<sup>5</sup>, S. Annapoorni<sup>1</sup>

<sup>1</sup> *Department of Physics and Astrophysics, University of Delhi, Delhi - 110007*

<sup>2</sup> *New Chemistry Unit, JNCASR, Jakkur, Bengaluru, Karnataka, India 560064*

<sup>3</sup> *National Synchrotron Radiation Research Center (NSRRC), Hsinchu 30076, Taiwan*

<sup>4</sup> *Department of Physics, Tamkang University, Tamsui 251301, Taiwan*

<sup>5</sup> *Department of Physics & Centre for Interdisciplinary Research, University of Petroleum and Energy Studies (UPES) Dehradun, Uttarakhand, 248007, India*

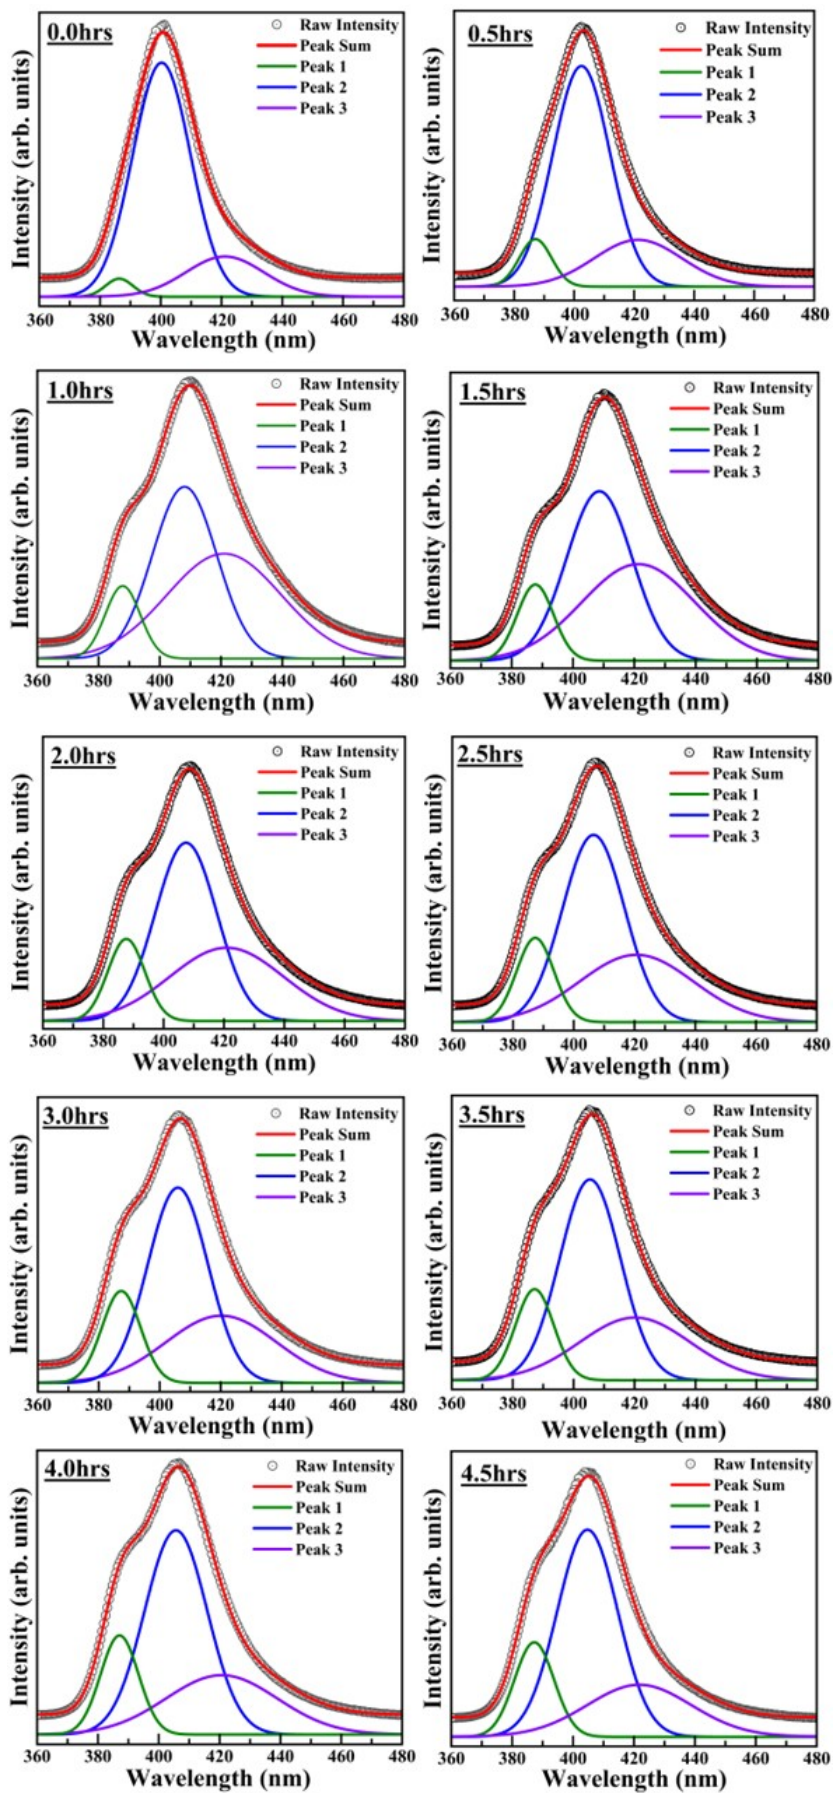

*Fig. S1. Deconvoluted NBGE peak obtained after different excitation time with 9669 eV X-ray energy.*

| Time (hours) | Peak 1 | Peak 2 | Peak 3 | $X^2$                  |
|--------------|--------|--------|--------|------------------------|
| 0.0          | 387.3  | 400.3  | 421.1  | $2.938 \times 10^{-4}$ |
| 0.5          | 387.2  | 402.6  | 421.4  | $4.206 \times 10^{-4}$ |
| 1.0          | 387.9  | 408.1  | 421.0  | $3.779 \times 10^{-4}$ |
| 1.5          | 387.7  | 408.6  | 421.3  | $2.365 \times 10^{-4}$ |
| 2.0          | 387.6  | 407.4  | 420.9  | $2.067 \times 10^{-4}$ |
| 2.5          | 387.3  | 406.5  | 420.7  | $1.821 \times 10^{-4}$ |
| 3.0          | 387.4  | 406.0  | 420.5  | $1.759 \times 10^{-4}$ |
| 3.5          | 387.4  | 405.7  | 420.5  | $2.001 \times 10^{-4}$ |
| 4.0          | 387.3  | 405.4  | 420.7  | $1.812 \times 10^{-4}$ |
| 4.5          | 387.3  | 404.7  | 421.7  | $2.521 \times 10^{-4}$ |

Table I: Peak positions of the deconvoluted gaussian peaks of the NBGE peak in M-ZnO for different excitation time at 9669.0 eV synchrotron X-ray energy excitation.

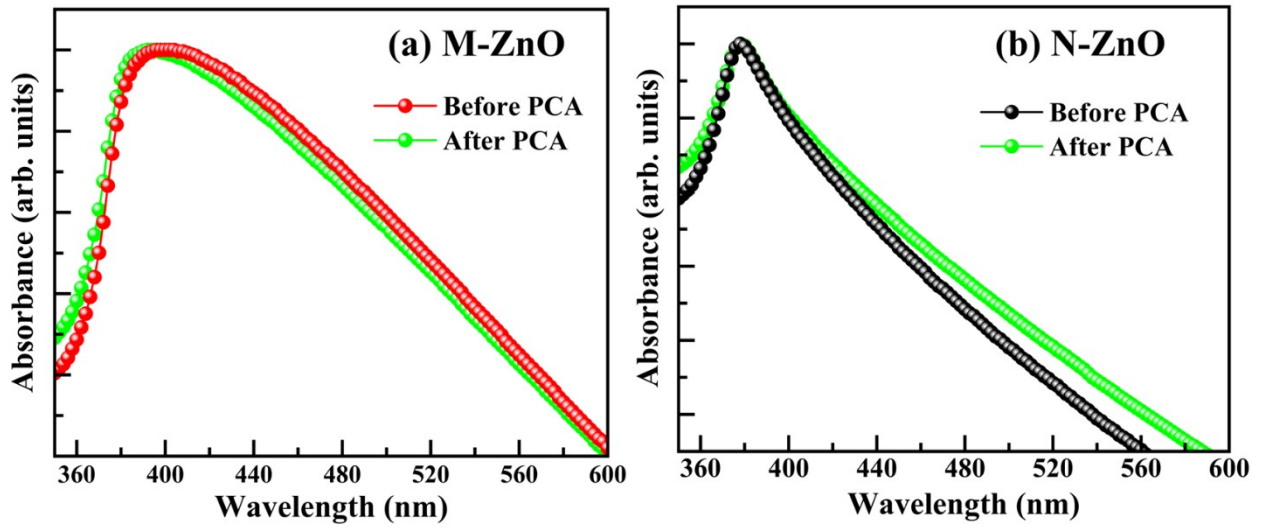

Fig. S2. Observed UV-Visible spectra of (a) M-ZnO and (b) N-ZnO collected before and after performing the photocatalytic activity using RhB dye.

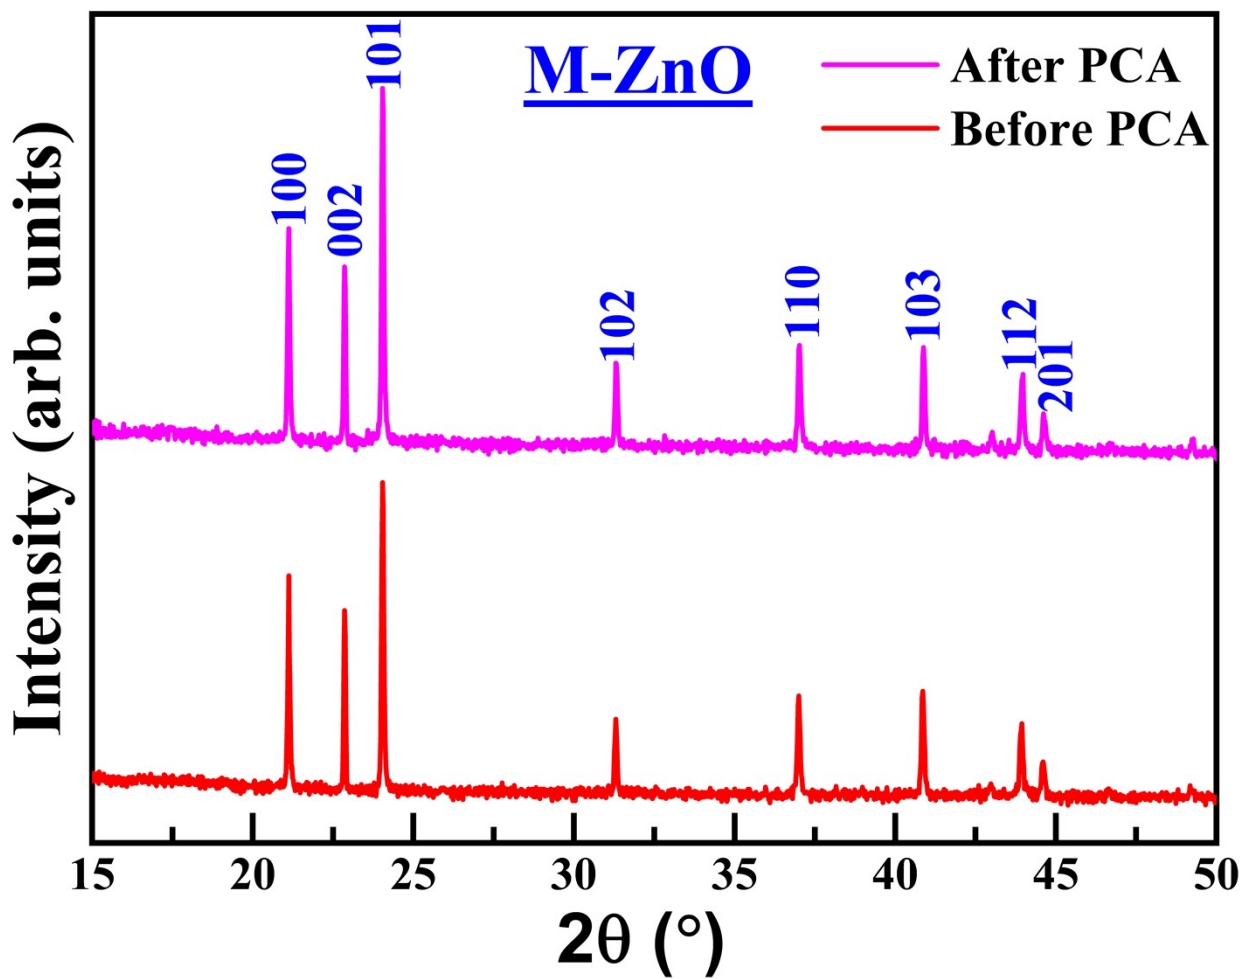

Fig. S3. The collected X-Ray diffraction spectra of M-ZnO obtained before and after investigating the photocatalytic activity (PCA) with Rhodamine B dye.

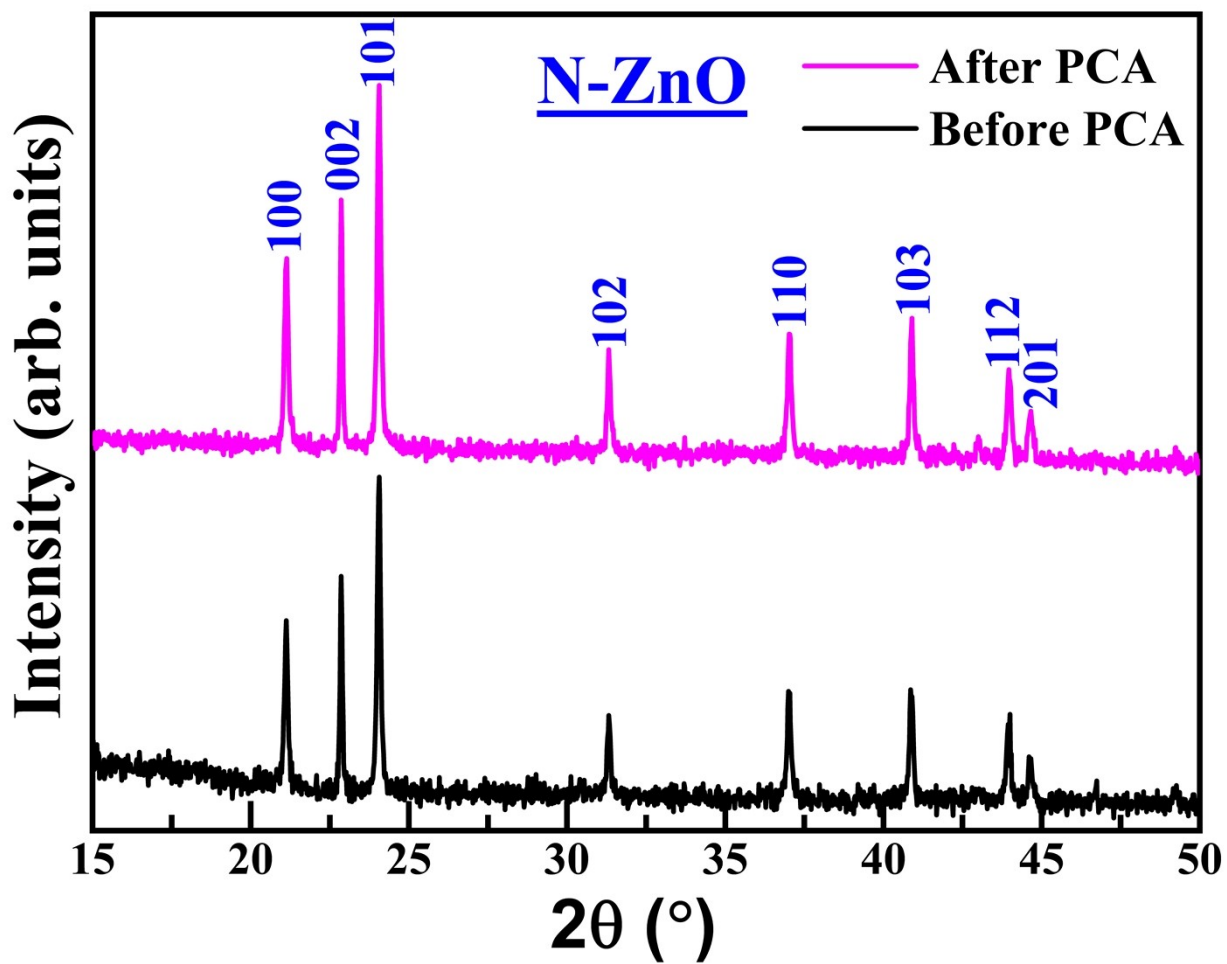

Fig. S4. The collected X-Ray diffraction spectra of N-ZnO obtained before and after investigating the photocatalytic activity (PCA) with Rhodamine B dye.
